# Supplementary material for: Synthesis, optical properties and singlet oxygen generation of a phthalocyanine derivative containing strong two-photon-absorbing chromophores in the periphery
Source: Royal Society of Chemistry journal article supplement (doi:10.1039/c1pp05166k), 2011-09-13
Supplement: c1pp05166k.pdf [file c1pp05166k.pdf]

## Supporting Information

### Optical property and singlet oxygen generation of phthalocyanine derivative with strong two-photon-absorbing chromophores in the periphery

Zijun Liu, Xiaoqin Xiong, Yu Li, Suyue Li, Jingui Qin

#### Instrumentation and reagents

$^1\text{H}$  NMR and  $^{13}\text{C}$  NMR spectra were recorded on Varian Mercury VX300 FT-NMR spectrometer in  $\text{CDCl}_3$  (Varian, USA) operating at 298 K. Elemental analysis was performed by Vario EL III (German). Mass spectra were recorded on Finnigan Trance Mass spectrometer. MALDI-TOF was operated on Voyager-DE-STR. UV-vis spectra were obtained using a Shimadzu 160A spectrometer. Fluorescence spectra were recorded on a Hitachi F-4500 fluorescence spectrophotometer. Two-photon absorption were determined by Z-scan measurement in DMF ( $1 \times 10^{-3}$  M) at 830, 850 and 870 nm with Ti: Sapphire laser (Mira 900, Coherent; 2.5 ps, 76 MHz,  $I_0 = 0.03$  GW/  $\text{cm}^2$ ). Singlet oxygen experiment was performed by exposing the solution of sample to a halogen lamp (300 W). Between with them, there is a filter (FS2-GG420), which used to filter off the light that wavelength shorter than 420 nm.

DPBF and DBU were purchased from Acros and used without further purification. 4-hydroxyphthalonitrile and 4, 6-Bis-[2-(4-diethylamino-phenyl)-vinyl]-pyrimidin-2-ol were synthesized as in the literatures. All other beginning chemicals are commercially available and were used as received unless stated otherwise. The solvent was dried as normal procedure and the solution of samples were prepared freshly and wrapped in silver paper before measurement.

## Optical Spectrum

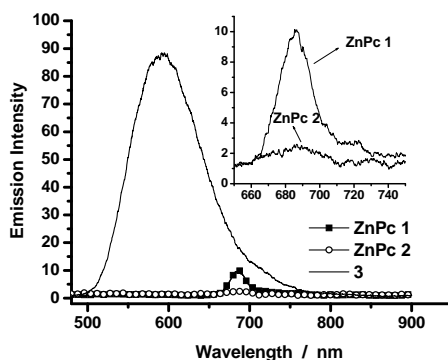

Fig. S1 Emission spectra of the three compounds ( $\lambda_{\text{ex}} = 460 \text{ nm}$ )

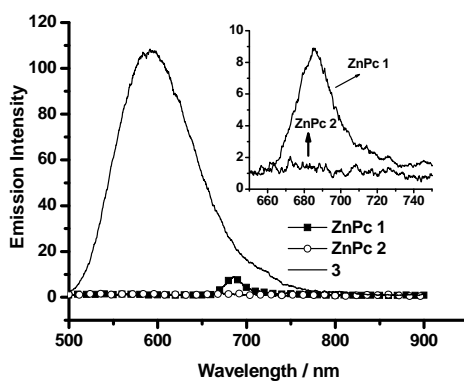

Fig. S2 Emission spectra of the three compounds ( $\lambda_{\text{ex}} = 480 \text{ nm}$ )

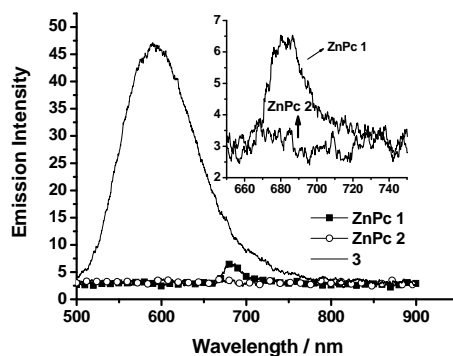

Fig. S3 Emission spectra of the three compounds ( $\lambda_{\text{ex}} = 470 \text{ nm}$ , the concentration of ZnPc is  $4 \times 10^{-7} \text{ M}$ )

Note: The inset in Fig. S1, S2 and S3 are the argument of the emission of ZnPc 1 and 2 between 650 and 750 nm.

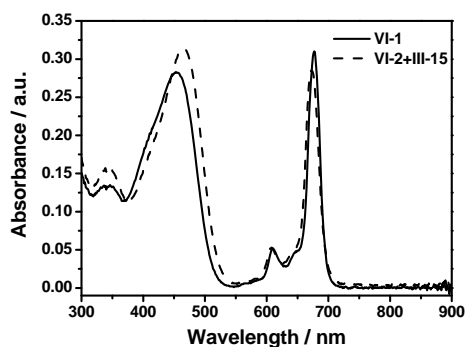

Fig. S4 The absorption of ZnPc 1 (1  $\mu$ M) and the mixture of ZnPc 2 (1  $\mu$ M) with Compound 3 (4  $\mu$ M).

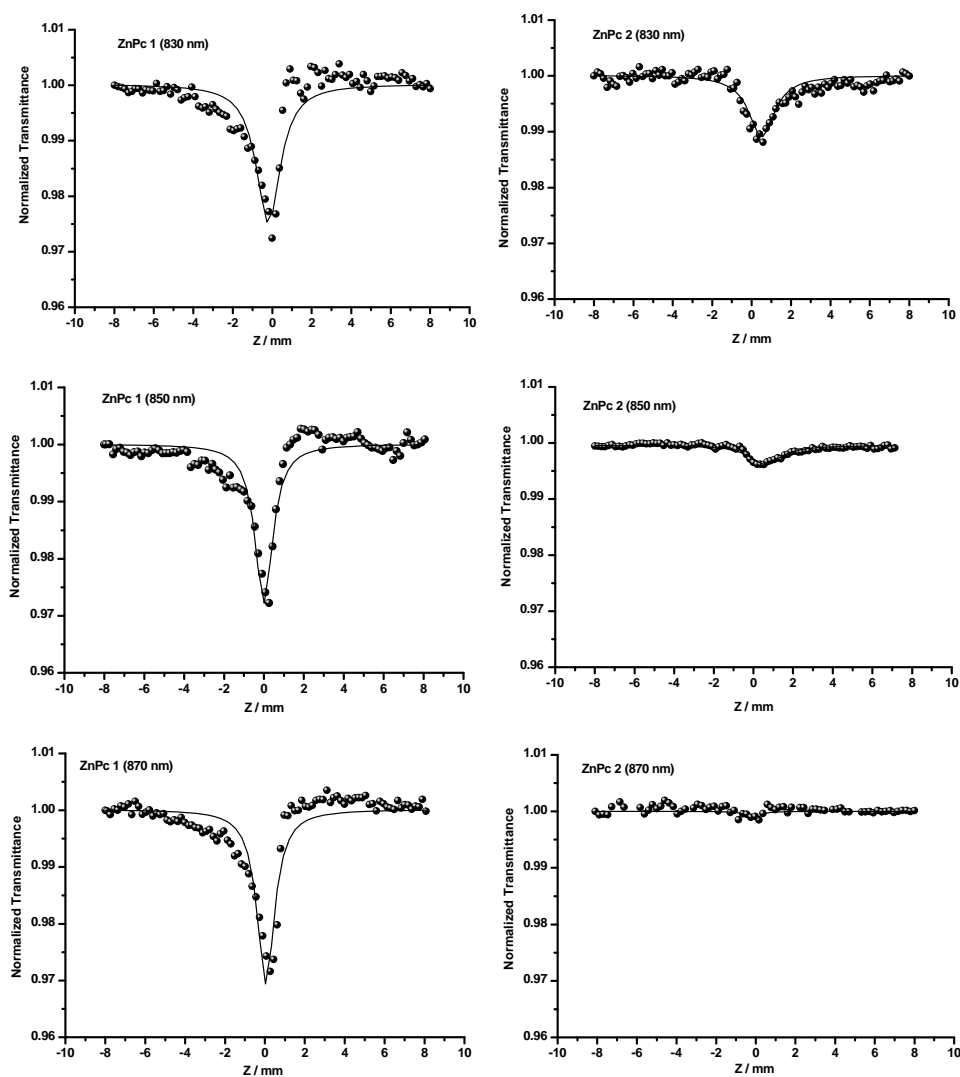

Fig. S5 Z-scan curves of the ZnPc 1 and 2 in DMF at 830, 850 and 870 nm.
